# Supplementary material for: Detection of Mycobacterium tuberculosis GlcB or HspX Antigens or devR DNA Impacts the Rapid Diagnosis of Tuberculous Meningitis in Children
Source: PubMed Central journal article supplement (PMC3440320; doi:10.1371/journal.pone.0044630), 2012-09-12
Supplement: pone.0044630.s008.pdf [file pone.0044630.s008.pdf]

## Appendix S1. Proforma for Clinical information

**Name:** \_\_\_\_\_ **Fathers name:** \_\_\_\_\_ **Age: Sex:M/F** \_\_\_\_\_  
**Date of admission** \_\_\_\_\_ **C.R.No:** \_\_\_\_\_ **Date of discharge:** \_\_\_\_\_

**Postal address:** \_\_\_\_\_

**Phone:** \_\_\_\_\_

(write "1" in box if the symptom /sign is present, write "0" if not present and enter the duration in space provided)

**Those in bold letter are essential entries in all patients**

| History/symptoms                | 1 if yes, 0 if No | Duration (days) |
|---------------------------------|-------------------|-----------------|
| <b>Fever</b>                    |                   |                 |
| Headache                        |                   |                 |
| <b>Vomiting</b>                 |                   |                 |
| Seizures                        |                   |                 |
| Focal seizures                  |                   |                 |
| <b>Lethargy / irritability</b>  |                   |                 |
| <b>Focal deficit</b>            |                   |                 |
| <b>Sensorial changes</b>        |                   |                 |
| Poor feeding                    |                   |                 |
| Cough                           |                   |                 |
| Rapid breathing                 |                   |                 |
| Weight loss                     |                   |                 |
| Skin infection                  |                   |                 |
| Head injury/neurosurgery        |                   |                 |
| Ear discharge                   |                   |                 |
| Rash                            |                   |                 |
| Type of rash                    |                   |                 |
| Rhinitis                        |                   |                 |
| Constipation                    |                   |                 |
| Immunosuppression               |                   |                 |
| <b>Measles in last 3 months</b> |                   |                 |

| <b>History/symptoms</b>                  | <b>1 if yes, 0 if No</b> | <b>Duration (days)</b> |
|------------------------------------------|--------------------------|------------------------|
| steroid treatment                        |                          |                        |
| Any other predisposing factor            |                          |                        |
| Any other symptoms:(provide details):    |                          |                        |
| BCG vaccination                          |                          | NA                     |
| BCG Scar                                 |                          | NA                     |
| <b>Contact with TB patient</b>           |                          | NA                     |
| Relationship with patient:               |                          |                        |
| <b>Prior antibiotic use (IV or oral)</b> |                          |                        |

**Examination findings:**

Weight

Height:

Head circumference:

(write "1" in box if the symptom /sign is present, write "0" if not present )

**Those in bold letter are essential entries in all patients**

| <b>Finding</b>                                                                                     | <b>1 if yes, 0 if No</b> |
|----------------------------------------------------------------------------------------------------|--------------------------|
| Lymphadenopathy                                                                                    |                          |
| Rash                                                                                               |                          |
| Type of rash: (encircle)                      Petechial /Pupuric /maculopapular /vescicular/other: |                          |
| Parotid enlargement                                                                                |                          |
| Skin / mucosal ulcers                                                                              |                          |
| Any abnormality on Eye / Nose / throat examination.....                                            |                          |
| Any other finding on general physical examination.....                                             |                          |
| Worst GCS:....E.....M.....V.....                                                                   |                          |
| Bulging Fontanelle                                                                                 |                          |
| Decerebrate/decorticate posturing                                                                  |                          |
| <b>Focal deficits</b>                                                                              |                          |
| <b>Extrapyramidal signs</b>                                                                        |                          |
